# Supplementary material
Source: HighWire-hosted journal article supplement (https://svn.bmj.com/content/8/2/119)
Supplement: inline-supplementary-material-1 [file inline-supplementary-material-1.pdf]

| SNP       | chrom | other_allele | effect_allele | beta     | p_value  |
|-----------|-------|--------------|---------------|----------|----------|
| rs602633  | 1     | T            | G             | 0.096018 | 6.97E-17 |
| rs1711403 | 1     | A            | G             | -0.1231  | 2.22E-13 |
| rs1120651 | 1     | T            | C             | -0.07452 | 2.34E-08 |
| rs4845625 | 1     | T            | C             | -0.05072 | 3.93E-08 |
| rs1746485 | 1     | T            | G             | -0.05734 | 4.18E-05 |
| rs9982601 | 21    | C            | T             | 0.109779 | 1.33E-13 |
| rs180803  | 22    | G            | T             | -0.18092 | 1.64E-10 |
| rs1561198 | 2     | C            | T             | 0.058434 | 6.37E-10 |
| rs6544713 | 2     | T            | C             | -0.05147 | 8.88E-07 |
| rs515135  | 2     | T            | C             | 0.067499 | 3.09E-08 |
| rs2252641 | 2     | T            | C             | 0.033316 | 0.000516 |
| rs6725887 | 2     | T            | C             | 0.132885 | 9.51E-18 |
| rs1801251 | 2     | G            | A             | 0.038504 | 0.000106 |
| rs9818870 | 3     | C            | T             | 0.064618 | 2.21E-06 |
| rs1708733 | 4     | G            | T             | 0.060764 | 4.59E-08 |
| rs1878406 | 4     | C            | T             | 0.060427 | 1.24E-06 |
| rs7692387 | 4     | G            | A             | -0.0679  | 7.35E-09 |
| rs273909  | 5     | A            | G             | 0.055915 | 0.000124 |
| rs1094778 | 6     | T            | C             | -0.05313 | 1.63E-06 |
| rs1220533 | 6     | C            | T             | -0.0263  | 0.042067 |
| rs3130683 | 6     | C            | T             | 0.048553 | 0.004149 |
| rs9369640 | 6     | C            | A             | 0.089106 | 7.78E-19 |
| rs1219028 | 6     | C            | G             | -0.05799 | 0.001068 |
| rs3798220 | 6     | T            | C             | 0.350343 | 4.66E-09 |
| rs2048327 | 6     | T            | C             | 0.05748  | 2.46E-09 |
| rs4252120 | 6     | T            | C             | -0.03291 | 0.003319 |
| rs2023938 | 7     | T            | C             | 0.05912  | 0.000136 |
| rs1253989 | 7     | C            | A             | -0.04373 | 0.000178 |
| rs1155692 | 7     | C            | T             | -0.07257 | 5.34E-11 |
| rs3918226 | 7     | C            | T             | 0.133315 | 1.69E-09 |
| rs264     | 8     | G            | A             | -0.05831 | 1.06E-05 |
| rs2954029 | 8     | A            | T             | -0.04387 | 2.61E-06 |
| rs1333049 | 9     | G            | C             | 0.193224 | 3.86E-93 |
| rs3217992 | 9     | C            | T             | 0.128317 | 1.03E-42 |
| rs1112452 | 9     | T            | C             | 0.054077 | 0.045561 |
| rs579459  | 9     | C            | T             | -0.07296 | 1.14E-10 |
| rs2505083 | 10    | T            | C             | 0.061032 | 1.57E-10 |
| rs501120  | 10    | T            | C             | -0.07861 | 1.39E-11 |
| rs2047009 | 10    | T            | G             | 0.061258 | 2.75E-11 |
| rs2246833 | 10    | C            | T             | 0.06541  | 1.33E-11 |
| rs1120304 | 10    | T            | C             | -0.03549 | 0.000122 |
| rs1241340 | 10    | G            | A             | -0.07517 | 1.07E-07 |
| rs1104293 | 11    | G            | T             | 0.011753 | 0.219045 |
| rs1084029 | 11    | G            | A             | 0.054714 | 1.28E-08 |
| rs974819  | 11    | T            | C             | -0.06341 | 2.44E-10 |
| rs9326246 | 11    | C            | G             | -0.04578 | 0.002464 |
| rs1117211 | 12    | T            | C             | 0.041385 | 1.71E-05 |
| rs1105783 | 12    | G            | A             | 0.045745 | 0.000685 |
| rs3184504 | 12    | T            | C             | -0.06421 | 1.03E-09 |
| rs9319428 | 13    | G            | A             | 0.039639 | 7.13E-05 |
| rs9515203 | 13    | T            | C             | -0.07115 | 9.33E-10 |
| rs4773144 | 13    | A            | G             | 0.052385 | 3.87E-07 |
| rs2895811 | 14    | T            | C             | 0.040798 | 1.86E-05 |
| rs1729363 | 15    | C            | T             | -0.06968 | 5.72E-09 |
| rs7173743 | 15    | T            | C             | -0.07554 | 5.55E-16 |
| rs8042271 | 15    | G            | A             | -0.09671 | 3.68E-08 |
| rs1751484 | 15    | C            | A             | 0.050925 | 3.10E-07 |

|           |      |   |          |          |
|-----------|------|---|----------|----------|
| rs247616  | 16 C | T | -0.03119 | 0.002359 |
| rs1293658 | 17 G | A | -0.03327 | 0.000824 |
| rs2281727 | 17 A | G | 0.047117 | 7.11E-07 |
| rs15563   | 17 A | G | 0.039744 | 1.83E-05 |
| rs8080784 | 17 T | C | 0.068319 | 4.44E-07 |
| rs663129  | 18 G | A | 0.058163 | 3.20E-08 |
| rs1168430 | 19 G | A | -0.14078 | 0.001042 |
| rs1122608 | 19 G | T | -0.07324 | 2.73E-11 |
| rs445925  | 19 G | A | -0.08584 | 4.23E-06 |
| rs2075650 | 19 A | G | 0.071112 | 1.61E-06 |
